# Supplementary material for: Water level fluctuations drive bank instability in a hypertidal estuary
Source: Copernicus journal article supplement (doi:10.5194/esurf-2022-44), 2022-09-29
Supplement: Supplementary file [file esurf-2022-44-AC1-supplement.pdf]

esurf-2022-44. *Water level fluctuations drive bank instability in a hypertidal estuary.*

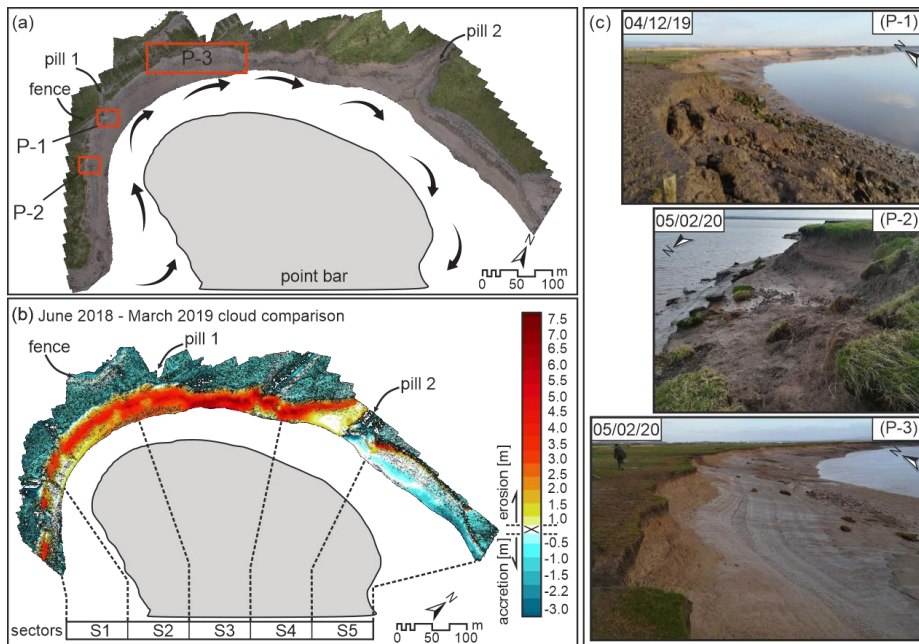

Figure 2 amended as per RC1.
